# Supplementary material for: Causal relationships between economic policy uncertainty and housing market returns in China and India: evidence from linear and nonlinear panel and time series models
Source: publisher site journal article supplement (doi:10.1515/snde-2016-0121), 2017-09-03
Supplement: Supplementary file 1 [file China+India_n.xls]

## Sheet: RHP
Country	RealHousingReturns_China	RealHousingReturnsIndia	EPU_China	EPU_India	Ln of Real House Price China	Ln of Real House Price India
2003Q1	0.480409	2.35194	4.93002	4.34796	4.41513	4.05367
2003Q2	0.836548	1.26068	4.64972	4.20467	4.42349	4.06628
2003Q3	1.44233	3.40081	4.63644	4.07902	4.43792	4.10029
2003Q4	-0.302746	2.63067	4.38539	3.90002	4.43489	4.12659
2004Q1	2.50722	1.74335	4.35421	4.12211	4.45996	4.14403
2004Q2	1.50616	2.35035	4.38317	4.76503	4.47502	4.16753
2004Q3	1.12934	1.99676	4.34189	4.04781	4.48632	4.1875
2004Q4	1.95522	2.56358	4.59972	4.13782	4.50587	4.21313
2005Q1	1.73828	2.95943	4.2357	3.92481	4.52325	4.24273
2005Q2	0.857564	3.61687	4.19314	4.26475	4.53183	4.2789
2005Q3	0.59473	3.72156	4.18365	3.7614	4.53777	4.31611
2005Q4	1.6277	2.64414	4.07588	3.74552	4.55405	4.34255
2006Q1	0.880281	4.11907	4.35049	3.54223	4.56285	4.38374
2006Q2	0.891559	3.165	4.63942	3.77248	4.57177	4.41539
2006Q3	0.887753	4.99763	3.91592	4.06015	4.58065	4.46537
2006Q4	0.557538	3.64353	4.12552	4.12577	4.58622	4.5018
2007Q1	0.616708	2.86905	4.27158	4.02173	4.59239	4.53049
2007Q2	1.06705	2.23356	4.16518	3.81097	4.60306	4.55283
2007Q3	0.691727	3.9077	4.55046	3.84975	4.60998	4.59191
2007Q4	1.41686	3.63114	4.58768	4.15134	4.62415	4.62822
2008Q1	-0.875341	-0.25628	5.0638	4.87092	4.61539	4.62566
2008Q2	-1.02223	-2.04859	4.90085	4.8469	4.60517	4.60517
2008Q3	-0.977159	-3.37386	5.38775	4.91752	4.5954	4.57143
2008Q4	0.0583004	-4.32321	5.32231	5.15131	4.59598	4.5282
2009Q1	1.08072	9.37685	5.26273	4.88671	4.60679	4.62197
2009Q2	1.48584	6.07047	4.82993	4.74292	4.62165	4.68267
2009Q3	1.56882	-2.04611	4.78	4.70753	4.63734	4.66221
2009Q4	2.66121	-2.37049	4.29294	4.35262	4.66395	4.63851
2010Q1	3.14848	-13.5465	4.56996	4.6168	4.69543	4.50304
2010Q2	0.618672	13.4595	4.71045	4.78587	4.70162	4.63764
2010Q3	-1.22662	4.99266	4.59349	4.56739	4.68935	4.68756
2010Q4	-0.258171	-0.187942	4.48943	4.76926	4.68677	4.68568
2011Q1	0.156141	0.442223	4.75935	4.80134	4.68833	4.69011
2011Q2	0.508808	-1.65152	4.2893	4.53447	4.69342	4.67359
2011Q3	2.25005	1.45218	5.21527	5.32301	4.71592	4.68811
2011Q4	-1.94643	4.79219	5.73301	5.4468	4.69646	4.73603
2012Q1	-2.99086	-1.10681	5.5575	5.30292	4.66655	4.72497
2012Q2	-1.9483	-1.25838	5.41852	5.45741	4.64707	4.71238
2012Q3	2.65566	1.87957	5.42174	5.03421	4.67362	4.73118
2012Q4	-0.517203	1.98432	5.58576	5.02958	4.66845	4.75102

## Sheet: Sheet1
77.3203	138.383
66.9988	104.555
59.0874	103.176
49.4037	80.2696
61.6894	77.8051
117.335	80.0914
57.272	76.8527
62.666	99.4564
50.6437	69.1097
71.1469	66.2301
43.0084	65.6052
42.3309	58.9026
34.5439	77.5162
43.4877	103.484
57.9832	50.1951
61.9155	61.8998
55.7976	71.6348
45.1944	64.4041
46.9812	94.676
63.5192	98.266
130.44	158.19
127.345	134.403
136.664	218.711
172.658	204.857
132.517	193.007
114.769	125.202
110.779	119.105
77.6817	73.1816
101.17	96.5407
119.805	111.103
96.2929	98.8387
117.832	89.0708
121.673	116.67
93.1738	72.9151
205.001	184.061
232.015	308.898
200.922	259.173
234.489	225.545
153.579	226.273
152.868	266.602
